# Supplementary material for: Surface and Structural Studies of Age-Related Changes in Dental Enamel: An Animal Model
Source: MDPI journal article supplement (doi:10.3390/ma15113993), 2022-06-03
Supplement: s1 [file s1]

# Supplementary Material

## Surface and Structural Studies of Age-Related Changes in Dental Enamel: An Animal Development Model

Izabela Świetlicka <sup>1\*</sup>, Ewa Tomaszewska <sup>2</sup>, Siemowit Muszyński <sup>1</sup>, Michał Świetlicki <sup>3</sup>, Tomasz Skrzypek <sup>4</sup>, Wojciech Grudziński <sup>5</sup>, Wiesław I. Gruszecki <sup>5</sup>, Daniel Kamiński <sup>6</sup>, Marta Arczewska <sup>1\*</sup>

<sup>1</sup> Department of Biophysics, Faculty of Environmental Biology, University of Life Sciences, Akademicka 13, 20-033 Lublin, Poland; izabela.swietlicka@up.lublin.pl (I.Ś.), marta.arczewska@up.lublin.pl (M.A.), siemowit.muszynski@up.lublin.pl (S.M)

<sup>2</sup> Department of Animal Physiology, Faculty of Veterinary Medicine, University of Life Sciences, Akademicka 12, 20-033 Lublin, Poland; ewarst@interia.pl (E.T.)

<sup>3</sup> Department of Applied Physics, Faculty of Mechanical Engineering, Lublin University of Technology, 20-618 Lublin, Poland; m.swietlicki@pollub.pl (M.Ś.)

<sup>4</sup> Laboratory of Confocal and Electron Microscopy, Centre for Interdisciplinary Research, Faculty of Science and Health, John Paul II Catholic University of Lublin, Konstantynów 1J, 20-708 Lublin, Poland; tomasz.skrzypek@kul.pl (T.S.)

<sup>5</sup> Department of Biophysics, Institute of Physics, Maria Curie-Skłodowska University, Maria Skłodowska-Curie 1, Lublin, 20-031 Poland; wojciech.grudzinski@mail.umcs.pl (W.G.), wieslaw.gruszecki@mail.umcs.pl (W.I.G.)

<sup>6</sup> Department of Crystallography, Faculty of Chemistry, Maria Curie-Skłodowska University, Maria Skłodowska-Curie 2, 20-031 Lublin, Poland; daniel.kaminski@umcs.pl (D.K.)

\* Correspondence: izabela.swietlicka@up.lublin.pl (I.Ś.), marta.arczewska@up.lublin.pl (M.A.)

**Table S1.** The MLP prediction for new data.

| Day expected | Day predicted | P     | Ca/P    | Fe   | FWHM    | a <sub>lattice</sub> | C/P <sub>IR</sub> | C/P <sub>Raman</sub> | DMT <sub>I</sub> | DMT <sub>II</sub> |
|--------------|---------------|-------|---------|------|---------|----------------------|-------------------|----------------------|------------------|-------------------|
| 0            | -0,12066      | 11,34 | 2,35626 | 0,00 | 0,76786 | 0,94530              | 0,119             | 0,14087              | 21,46            | 24,04             |
| 2            | 1,87859       | 12,95 | 2,13205 | 0,05 | 0,71542 | 0,94586              | 0,113             | 0,09267              | 23,22            | 27,53             |
| 5            | 5,18481       | 11,95 | 2,24393 | 0,62 | 0,62244 | 0,94457              | 0,112             | 0,05944              | 23,42            | 29,22             |
| 7            | 6,46094       | 12,09 | 2,20265 | 0,94 | 0,59539 | 0,94429              | 0,091             | 0,05814              | 28,01            | 29,58             |
| 10           | 9,90074       | 15,37 | 2,16109 | 2,53 | 0,54813 | 0,94399              | 0,081             | 0,04769              | 27,22            | 29,25             |
| 14           | 13,80436      | 15,50 | 2,21484 | 3,58 | 0,45768 | 0,94279              | 0,060             | 0,04992              | 27,29            | 28,99             |
| 21           | 23,80931      | 16,98 | 1,94312 | 3,28 | 0,44474 | 0,94282              | 0,065             | 0,04434              | 56,85            | 59,95             |
| 28           | 28,10221      | 18,65 | 1,92130 | 3,8  | 0,43876 | 0,94288              | 0,055             | 0,04581              | 57,09            | 62,22             |

**Table S2.** Mean Ca and P concentrations according to the day of postnatal life (dpn).

| Data | dpn | Mean amount [wt., %] | Standard Deviation |
|------|-----|----------------------|--------------------|
| Ca   | 0   | 23.523               | 5.946              |
|      | 2   | 22.239               | 5.851              |
|      | 5   | 25.073               | 2.792              |
|      | 7   | 27.098               | 5.758              |
|      | 10  | 34.336               | 1.536              |
|      | 14  | 33.209               | 1.768              |
|      | 21  | 33.076               | 2.894              |
|      | 28  | 33.799               | 1.223              |
| P    | 0   | 10.895               | 2.781              |
|      | 2   | 10.575               | 2.543              |
|      | 5   | 11.364               | 1.117              |
|      | 7   | 12.838               | 2.191              |
|      | 10  | 15.275               | 0.778              |
|      | 14  | 15.083               | 0.543              |
|      | 21  | 16.411               | 1.475              |
|      | 28  | 18.518               | 1.219              |

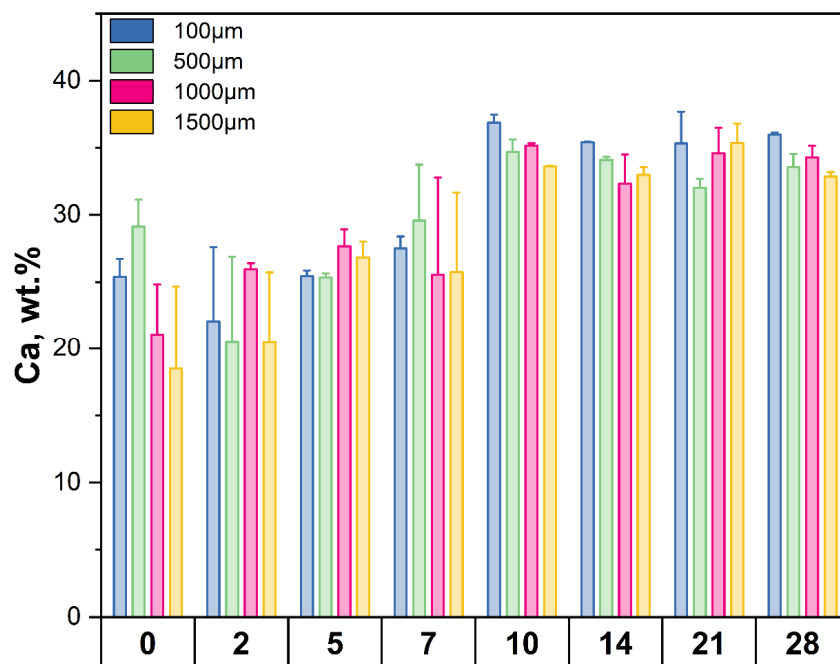

**Figure S1.** Ca amount dependence on the day of postnatal life and distance from the incisor's tip.

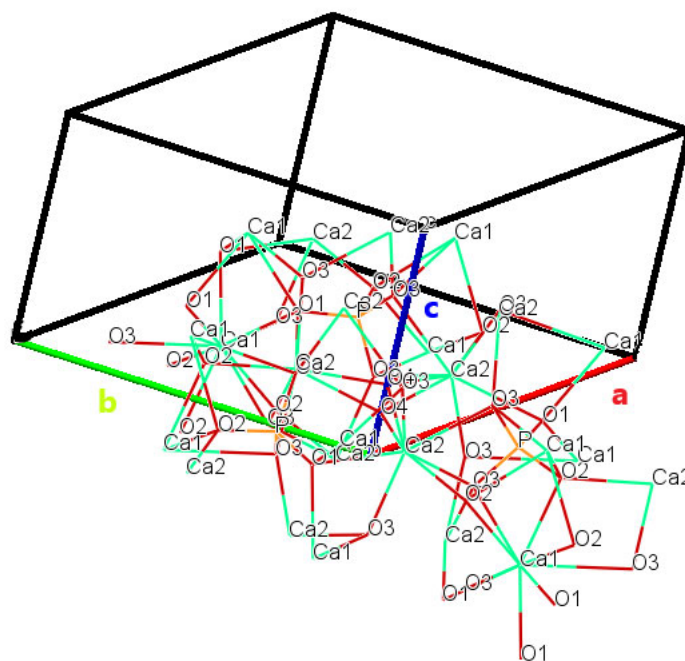

**Figure S2.** The chemical structure of synthetic hydroxyapatite with the selected cell and signed lattice parameters (Mercury 3.10.1); a – lattice parameter (length) in x direction, b – lattice parameter (length) in y direction, c – lattice parameter (length) in z direction

**Table S3.** Pearson's correlation coefficients between variables used in the MLP training.

| Variable               |       | Ca    | P     | Ca/P  | C     | Fe    | FWHM  | $a_{\text{lattice}}$ | $CI_{\text{Raman}}$ | $CI_{\text{FTIR}}$ | $(C/P)_{\text{FTIR}}$ | $(C/P)_{\text{Raman}}$ | DMT <sub>I</sub> | DMT <sub>II</sub> |
|------------------------|-------|-------|-------|-------|-------|-------|-------|----------------------|---------------------|--------------------|-----------------------|------------------------|------------------|-------------------|
| dpn                    | 1,00  |       |       |       |       |       |       |                      |                     |                    |                       |                        |                  |                   |
| Ca                     | 0,65  | 1,00  |       |       |       |       |       |                      |                     |                    |                       |                        |                  |                   |
| P                      | 0,82  | 0,93  | 1,00  |       |       |       |       |                      |                     |                    |                       |                        |                  |                   |
| Ca/P                   | -0,78 | -0,32 | -0,62 | 1,00  |       |       |       |                      |                     |                    |                       |                        |                  |                   |
| C                      | -0,56 | -0,31 | -0,40 | 0,35  | 1,00  |       |       |                      |                     |                    |                       |                        |                  |                   |
| Fe                     | 0,83  | 0,71  | 0,75  | -0,48 | -0,63 | 1,00  |       |                      |                     |                    |                       |                        |                  |                   |
| FWHM                   | -0,91 | -0,72 | -0,79 | 0,55  | 0,64  | -0,89 | 1,00  |                      |                     |                    |                       |                        |                  |                   |
| $a_{\text{lattice}}$   | -0,88 | -0,68 | -0,74 | 0,52  | 0,62  | -0,87 | 0,97  | 1,00                 |                     |                    |                       |                        |                  |                   |
| $CI_{\text{Raman}}$    | -0,40 | -0,39 | -0,40 | 0,28  | 0,35  | -0,44 | 0,52  | 0,47                 | 1,00                |                    |                       |                        |                  |                   |
| $CI_{\text{FTIR}}$     | 0,57  | 0,46  | 0,46  | -0,27 | -0,48 | 0,60  | -0,72 | -0,63                | -0,51               | 1,00               |                       |                        |                  |                   |
| $(C/P)_{\text{FTIR}}$  | -0,90 | -0,72 | -0,80 | 0,58  | 0,64  | -0,88 | 0,95  | 0,92                 | 0,48                | -0,68              | 1,00                  |                        |                  |                   |
| $(C/P)_{\text{Raman}}$ | -0,75 | -0,55 | -0,61 | 0,48  | 0,55  | -0,71 | 0,86  | 0,79                 | 0,60                | -0,74              | 0,78                  | 1,00                   |                  |                   |
| DMT <sub>I</sub>       | 0,90  | 0,48  | 0,70  | -0,80 | -0,45 | 0,67  | -0,73 | -0,73                | -0,28               | 0,36               | -0,72                 | -0,59                  | 1,00             |                   |
| DMT <sub>II</sub>      | 0,91  | 0,48  | 0,70  | -0,79 | -0,43 | 0,68  | -0,73 | -0,72                | -0,25               | 0,35               | -0,71                 | -0,57                  | 0,98             | 1,00              |
